# Supplementary material for: Slow integrin-dependent migration organizes networks of tissue-resident mast cells
Source: PubMed Central journal article supplement (PMC10232366; doi:10.1038/s41590-023-01493-2), 2023-04-20
Supplement: 41590_2023_1493_MOESM2_ESM.pdf [file 41590_2023_1493_MOESM2_ESM.pdf]

## Reporting Summary

Nature Portfolio wishes to improve the reproducibility of the work that we publish. This form provides structure for consistency and transparency in reporting. For further information on Nature Portfolio policies, see our [Editorial Policies](#) and the [Editorial Policy Checklist](#).

### Statistics

For all statistical analyses, confirm that the following items are present in the figure legend, table legend, main text, or Methods section.

n/a Confirmed

- The exact sample size ( $n$ ) for each experimental group/condition, given as a discrete number and unit of measurement
- A statement on whether measurements were taken from distinct samples or whether the same sample was measured repeatedly
- The statistical test(s) used AND whether they are one- or two-sided  
*Only common tests should be described solely by name; describe more complex techniques in the Methods section.*
- A description of all covariates tested
- A description of any assumptions or corrections, such as tests of normality and adjustment for multiple comparisons
- A full description of the statistical parameters including central tendency (e.g. means) or other basic estimates (e.g. regression coefficient) AND variation (e.g. standard deviation) or associated estimates of uncertainty (e.g. confidence intervals)
- For null hypothesis testing, the test statistic (e.g.  $F$ ,  $t$ ,  $r$ ) with confidence intervals, effect sizes, degrees of freedom and  $P$  value noted  
*Give  $P$  values as exact values whenever suitable.*
- For Bayesian analysis, information on the choice of priors and Markov chain Monte Carlo settings
- For hierarchical and complex designs, identification of the appropriate level for tests and full reporting of outcomes
- Estimates of effect sizes (e.g. Cohen's  $d$ , Pearson's  $r$ ), indicating how they were calculated

*Our web collection on [statistics for biologists](#) contains articles on many of the points above.*

### Software and code

Policy information about [availability of computer code](#)

#### Data collection

For imaging data collection: Zen Blue (v 2012) and Zen Black (v8.1) (Carl Zeiss Microscopy)  
For FACS data collection: FACSDiva (BD, v8.0.1).  
For Western Blot data collection: Image Lab TM Touch Software (Bio-Rad, v6)

#### Data analysis

Kymographs were analyzed using a Matlab program which is available at GitHub (<https://github.com/KMGlaser/Bambach-et-al.git>). Mast cell clusters were analyzed using ClusterQuant2D. ClusterQuant2D code is provided at: <https://zenodo.org/record/7684553>.  
Single-cell RNA sequencing analysis was done with the RaceID3 (v0.2.3) algorithm (Herman et al, 2018 Nat Methods 15, 379) and is available on CRAN (<https://cran.r-project.org/>) and RStudio (v4.0.2 GUI 1.72, source code as described previously, DOI: <https://doi.org/10.1038/nature12175>). Paired-end reads were aligned to the transcriptome using bwa (version 0.6.2-r126; <https://bioweb.pasteur.fr/packages/pack@bwa@0.6.2>).

For Imaging data analysis: Imaris (Bitplane, v9.1.2 and v9.5.1), Fiji (v2.1.0/1.53) and Huygens (SVI; v20.04)  
For FACS data analysis: FlowJo (BD, v10.6.1)  
For qPCR data analysis: Excel (Microsoft, v16)

For statistical data analysis and generation of graphs: Graphpad Prism (v9.3.1)

For manuscripts utilizing custom algorithms or software that are central to the research but not yet described in published literature, software must be made available to editors and reviewers. We strongly encourage code deposition in a community repository (e.g. GitHub). See the Nature Portfolio [guidelines for submitting code & software](#) for further information.

## Data

Policy information about [availability of data](#)

All manuscripts must include a [data availability statement](#). This statement should provide the following information, where applicable:

- Accession codes, unique identifiers, or web links for publicly available datasets
- A description of any restrictions on data availability
- For clinical datasets or third party data, please ensure that the statement adheres to our [policy](#)

Single-cell RNA-sequencing data have been deposited in Gene Expression Omnibus (GEO) with the accession code GSE205412 (<https://www.ncbi.nlm.nih.gov/geo/query/acc.cgi?acc=GSE205412>). Genome annotation ENCODE VM9 (<https://hgdownload.soe.ucsc.edu/gbdb/mm10/>) was used for mapping single-cell RNA-sequencing data. All other data supporting the findings of this study are included in the article, its supplementary materials or source data.

## Human research participants

Policy information about [studies involving human research participants and Sex and Gender in Research](#).

|                             |                                                                                      |
|-----------------------------|--------------------------------------------------------------------------------------|
| Reporting on sex and gender | <input type="text" value="This study doesn't include human research participants."/> |
| Population characteristics  | <input type="text" value="N/A"/>                                                     |
| Recruitment                 | <input type="text" value="N/A"/>                                                     |
| Ethics oversight            | <input type="text" value="N/A"/>                                                     |

Note that full information on the approval of the study protocol must also be provided in the manuscript.

## Field-specific reporting

Please select the one below that is the best fit for your research. If you are not sure, read the appropriate sections before making your selection.

Life sciences       Behavioural & social sciences       Ecological, evolutionary & environmental sciences

For a reference copy of the document with all sections, see [nature.com/documents/nr-reporting-summary-flat.pdf](https://nature.com/documents/nr-reporting-summary-flat.pdf)

## Life sciences study design

All studies must disclose on these points even when the disclosure is negative.

|                 |                                                                                                                                                                                                                                                                                                                                                                                                                                                 |
|-----------------|-------------------------------------------------------------------------------------------------------------------------------------------------------------------------------------------------------------------------------------------------------------------------------------------------------------------------------------------------------------------------------------------------------------------------------------------------|
| Sample size     | <input type="text" value="No statistical methods were used to predetermine sample size. They were determined based on our previous publications, prior experience or pilot experiments."/>                                                                                                                                                                                                                                                      |
| Data exclusions | <input type="text" value="For most experiments: No data exclusion methods were used. For image analysis of mast cell proximity to arterioles: Cells at ACTA2-positive structures without characteristic arteriolar morphology (capillaries) were manually excluded from the analysis. Sc-RNAseq analysis: A very small cell subset showed additional macrophage features (cluster 10) (ED Fig. 5c), which we excluded from further analysis."/> |
| Replication     | <input type="text" value="Reproducibility of the experimental findings was verified using biological replicates and independent experiments. The numbers are indicated in the respective figures (individual data points). Most experimental findings were replicated by independent experiments through several lab members."/>                                                                                                                |
| Randomization   | <input type="text" value="Experimental groups were defined by inhibitor treatment or by the genotype. Mast cells and mast cell clusters were randomly chosen for tracking, cell size analysis or cluster size determination, respectively."/>                                                                                                                                                                                                   |
| Blinding        | <input type="text" value="Experimentalists were blinded regarding the genotype of mice or BMCC cultures. Mouse numbers were used as identifiers."/>                                                                                                                                                                                                                                                                                             |

## Reporting for specific materials, systems and methods

We require information from authors about some types of materials, experimental systems and methods used in many studies. Here, indicate whether each material, system or method listed is relevant to your study. If you are not sure if a list item applies to your research, read the appropriate section before selecting a response.

## Materials &amp; experimental systems

## Methods

| n/a                                 | Involved in the study                                           |
|-------------------------------------|-----------------------------------------------------------------|
| <input type="checkbox"/>            | <input checked="" type="checkbox"/> Antibodies                  |
| <input type="checkbox"/>            | <input checked="" type="checkbox"/> Eukaryotic cell lines       |
| <input checked="" type="checkbox"/> | <input type="checkbox"/> Palaeontology and archaeology          |
| <input type="checkbox"/>            | <input checked="" type="checkbox"/> Animals and other organisms |
| <input checked="" type="checkbox"/> | <input type="checkbox"/> Clinical data                          |
| <input checked="" type="checkbox"/> | <input type="checkbox"/> Dual use research of concern           |

| n/a                                 | Involved in the study                              |
|-------------------------------------|----------------------------------------------------|
| <input checked="" type="checkbox"/> | <input type="checkbox"/> ChIP-seq                  |
| <input type="checkbox"/>            | <input checked="" type="checkbox"/> Flow cytometry |
| <input checked="" type="checkbox"/> | <input type="checkbox"/> MRI-based neuroimaging    |

## Antibodies

## Antibodies used

IgE coating of mast cells  
 Mouse Anti-Dinitrophenyl (DNP) IgE, clone: SPE-7; provided by Marc Schmidt-Supprian, TU Munich, Germany; used in all assays 1:300 (1 $\mu$ g/ml)

## BMMC &amp; PMC validation by FACS

Rat Anti-CD117 Brilliant Violet 421-conjugated; BioLegend; Cat# 105827; 1:200  
 Armenian Hamster Anti-Fc $\epsilon$ R1 $\alpha$  Alexa Fluor 647-conjugated; BioLegend; Cat# 134309; 1:200

## Fibronectin staining

Rabbit Anti-fibronectin; Sigma-Aldrich; Cat# F3648; 1:200  
 Donkey Anti-rabbit Alexa Fluor 488-conjugated; Invitrogen; Cat# A-21206; 1:400

## Mast cell maturation and integrin expression

Rat Anti-CD16/CD32 Antibody; BD Biosciences; Cat# 553142; 1:250  
 Armenian Hamster Anti-Fc $\epsilon$ R1 $\alpha$  Alexa Fluor 647-conjugated; BioLegend; Cat# 134309; 1:200  
 Armenian Hamster Anti-CD29 (Integrin beta 1) PE-conjugated; BioLegend; Cat# 102208; 1:400  
 Rat Anti-CD117 Brilliant Violet 421-conjugated; BioLegend; Cat# 105827; 1:800  
 Rat Anti-CD49f (Integrin alpha 6) Alexa Fluor<sup>®</sup> 488-conjugated; BioLegend; Cat# 313608; 1:400  
 Armenian Hamster IgG Isotype Control PE-conjugated; BioLegend; Cat# 400907; 1:400  
 Rat Anti-CD11b (Integrin alpha M) PE-conjugated; BD Biosciences; Cat# 557397; 1:400  
 Rat Anti-CD18 (Integrin beta 2) PE-conjugated; clone C71/16; BD Biosciences; Cat# 553293; 1:400  
 Rat Anti-CD49e (Integrin alpha 5); PE-conjugated, BD Biosciences; Cat# 557447; 1:400  
 Rat Anti-CD51 (Integrin alpha V) PE-conjugated BD; Biosciences; Cat# 551187; 1:400  
 Armenian Hamster Anti-CD61 (Integrin beta 3) PE-conjugated; BD Biosciences; Cat# 553347; 1:400  
 Rat Anti-Integrin  $\beta$ 7 Chain PE-conjugated; BD Biosciences; Cat# 557498; 1:400  
 Rat Anti-CD41 (Integrin alpha IIb) FITC-conjugated; BD Bioscience; Cat# 553848; 1:400  
 Rat Anti-CD49d (Integrin alpha 4) PE-conjugated; Thermo Fisher Scientific; Cat# 12-0492-82; 1:400  
 Rat IgG2a kappa Isotype Control PE-conjugated; Thermo Fisher Scientific; Cat# 12-4321-80; 1:400  
 Rat IgG2b kappa Isotype Control PE-conjugated; Thermo Fisher Scientific; Cat# 12-4031-82; 1:400  
 Rat IgG2a Isotype Control Alexa Fluor 488-conjugated; Thermo Fisher Scientific; Cat# R2a20; 1:400  
 Rat IgG1 kappa Isotype Control FITC-conjugated; Thermo Fisher Scientific; Cat# 11-4301-81; 1:400  
 Rat Anti-CD18 (Integrin beta 2) FITC-conjugated; clone C71/16; BD Biosciences; Cat. 553292; 1:200  
 Rat Anti-CD29 Alexa Fluor 488 conjugated (Integrin beta 1, HMBeta1-1); BioLegend; Cat# 102211; 1:200  
 Rat IgG2b kappa isotype control FITC conjugated; ThermoFisher Scientific; Cat# 11-4031-82; 1:400  
 Rat Anti-CD117 APC-conjugated; ThermoFisher Scientific; Cat# 17-1172-83; 1:200  
 Armenian Hamster Anti-Fc $\epsilon$ R1 $\alpha$  PE/CY7-conjugated; BioLegend; Cat# 134318; 1:200  
 Armenian Hamster IgG isotype control Alexa Fluor 488-conjugated; BD Bioscience; Cat# 53-4888-80; 1:200

## Talin-1 depletion analysis

Mouse Anti-talin, clone:8d4; Sigma-Aldrich; Cat# T3287; 1:300 for FACS and 1:1000 for Western Blot  
 Donkey Anti-mouse Cy3TM-conjugated; Jackson ImmunoResearch Labs; Cat# 715-165-150; 1:800  
 Rabbit Anti-actin; Sigma-Aldrich; Cat# A2066; 1:2000  
 Rabbit Anti-mouse HRP-conjugated Antibody; Agilent Dako; Cat# P0161; 1:5000  
 Swine Anti-rabbit HRP-conjugated Antibody; Agilent Dako; Cat# P0217; 1:5000

## Ear skin whole mount immunofluorescence analysis

Mouse Anti-smooth muscle actin (ACTA2) Alexa Fluor 405-conjugated; Abcam; Cat# ab210128; 1:500  
 Mouse Anti-smooth muscle actin (ACTA2) Cy3TM-conjugated; Sigma-Aldrich; Cat# C6198; 1:500  
 Rat anti-CD31; BD Bioscience; Cat# 550274; 1:150  
 Rabbit Anti-collagen IV; Abcam; Cat# ab19808; 1:500  
 Rat Anti-ACKR1 Alexa Fluor 488-conjugated, clone 6B7, provided by Aude Thiriou, Department of Immunology, Harvard Medical School, Boston; 1:300  
 Rabbit Anti-Desmin; Abcam; Cat# ab32362; 1:300  
 Rat Anti-endomucin; Invitrogen; Cat# 14-5851-81; 1:500  
 Rabbit Anti-fibronectin; Sigma-Aldrich; Cat# F3648; 1:200  
 Rabbit Anti-Lamc1; Sigma-Aldrich; Cat# HPA001909; 1:300  
 Goat Anti-Mcpt6; R&D Systems; Cat# AF3736; 1:600  
 Anti-MITF polyclonal; Atlas Antibodies; Cat# HPA003259; 1:100  
 Rabbit Anti-NG2; Sigma-Aldrich; Cat# AB5320; 1:200

Rat Anti-PDGFR $\alpha$ ; Invitrogen; Cat# 14-4321-82; 1:200  
 Rabbit Anti-Vimentin; Abcam; Cat# ab92547; 1:300  
 Goat Anti-rabbit Alexa Fluor 405-conjugated; Thermo Fisher Scientific; Cat# A-31556; 1:300  
 Donkey Anti-goat Alexa Fluor 488-conjugated; Thermo Fisher Scientific; Cat# A-11055; 1:500  
 Donkey Anti-rabbit Alexa Fluor 568-conjugated; Thermo Fisher Scientific; Cat# A10042; 1:500  
 Donkey Anti-rabbit Alexa Fluor 488-conjugated; Invitrogen; Cat# A-21206; 1:500  
 Donkey Anti-rat Alexa Fluor 647-conjugated; Abcam; Cat# ab150155; 1:500  
 Donkey Anti-rat Alexa Fluor 405-conjugated; Abcam; Cat# ab175670; 1:500  
 Rabbit Anti-Red Fluorescent Protein (RFP); Rockland; Cat# 600-401-379; 1:1000  
 Goat Anti-GFP Dylight™ 488-conjugated; Rockland; Cat# 600-141-215; 1:1000

#### Immunofluorescence analysis of adhesion structures in mast cells

Mouse Anti-talin, clone:8d4; Sigma-Aldrich; Cat# T3287; 1:200  
 Mouse Anti-vinculin; Sigma-Aldrich; Cat# V9264; 1:200  
 Rat Anti-CD29 (Integrin beta 1, 9EG7); BD Biosciences; Cat# 553715; 1:200  
 Mouse Anti-paxillin; BD Biosciences; Cat# 610051; 1:200  
 Rat Anti-CD49e (Integrin alpha 5); BD Biosciences; Cat# 557446; 1:200  
 Goat Anti-rat Alexa Fluor 568-conjugated; Invitrogen; Cat# A-11077; 1:500  
 Goat Anti-mouse Alexa Fluor 647-conjugated; Invitrogen; Cat# A-21237; 1:500  
 Donkey Anti-mouse Cy3TM-conjugated; Jackson ImmunoResearch Labs; Cat# 715-165-150; 1:1000  
 Rabbit Anti-fibronectin; Sigma-Aldrich; Cat# F3648; 1:200  
 Goat Anti-rabbit Alexa Fluor 405-conjugated; Thermo Fisher Scientific; Cat# A-31556; 1:500  
 anti-rat CyTM3; Jackson ImmunoResearch; Cat: 712-166-153; 1:1000

#### RNA-FISH

Rat Anti-nidogen (NG2); Thermo Fisher; Cat# MA1-06501; 1:300  
 Donkey Anti-rat Alexa Fluor 405-conjugated; Abcam; Cat# ab175670; 1:500

#### FACS sort for single-cell RNA sequencing

Mouse Anti-CD45.2 Brilliant Violet 711™-conjugated; BioLegend; Cat# 109847; 1:100  
 Armenian Hamster Anti-CD3e PE-conjugated; Thermo Fisher Scientific; Cat# 2-0031-83; 1:100  
 Rat Anti-CD4; PE-conjugated BioLegend; Cat# 100407; 1:100  
 Rat Anti-CD8a PE-conjugated; Thermo Fisher Scientific; Cat# 12-0081-82; 1:100  
 Armenian Hamster Anti-CD11c (Integrin alpha X)PE-conjugated; BioLegend; Cat# 117307; 1:100  
 Rat Anti-CD19 PE-conjugated; Thermo Fisher Scientific; Cat# 12-0193-83; 1:100  
 Mouse Anti-NK-1.1 PE-conjugated; BioLegend; Cat# 108707; 1:100  
 Rat Anti-F4/80 PE-conjugated; Thermo Fisher Scientific; Cat# MF48004; 1:100

## Validation

All commercial antibodies, validation informations can be found on the antibody registry (<https://antibodyregistry.org>) or company websites:

Armenian Hamster Anti-CD11c (Integrin alpha X)PE-conjugated; PRID: AB\_313776  
 Armenian Hamster Anti-CD29 (Integrin beta 1) PE-conjugated; PRID: AB\_312885  
 Armenian Hamster Anti-CD3e PE-conjugated; PRID:AB\_465496  
 Armenian Hamster Anti-CD61 (Integrin beta 3) PE-conjugated; PRID: AB\_394800  
 Armenian Hamster Anti-Fc $\epsilon$ R1 $\alpha$  Alexa Fluor 647-conjugated; PRID: AB\_1626097  
 Armenian Hamster Anti-Fc $\epsilon$ R1 $\alpha$  PE/CY7-conjugated; PRID AB\_10640122  
 Armenian Hamster IgG Isotype Control PE-conjugated; PRID: AB\_326593  
 Donkey Anti-goat Alexa Fluor 488-conjugated; PRID: AB\_2534102  
 Rabbit Anti-Red Fluorescent Protein (RFP); PRID:AB\_2209751  
 Donkey Anti-mouse CyTM3-conjugated; PRID: AB\_2340813  
 Donkey Anti-rabbit Alexa Fluor 488-conjugated; PRID: AB\_2535792  
 Donkey Anti-rabbit Alexa Fluor 568-conjugated; PRID: AB\_2534017  
 Donkey Anti-rat Alexa Fluor 405-conjugated; <https://www.abcam.com/donkey-rat-igg-hl-alex-fluor-405-preadsorbed-ab175670.html>  
 Donkey Anti-rat Alexa Fluor 647-conjugated; PRID: AB\_2813835  
 Goat Anti-GFP Dylight™ 488-conjugated; RRID: AB\_1961516  
 Goat Anti-Mcpt6; PRID: AB\_884330  
 Goat Anti-mouse Alexa Fluor 647-conjugated; PRID: AB\_2535806  
 Goat Anti-rabbit Alexa Fluor 405-conjugated; PRID: AB\_221605  
 Goat Anti-rat Alexa Fluor 568-conjugated; PRID: AB\_2534121  
 Mouse Anti-CD45.2 Brilliant Violet 711™-conjugated; PRID: AB\_2616859  
 Mouse Anti-Dinitrophenyl (DNP) IgE: Eshhar, Z., Ofarim, M. & Waks, T. Generation of hybridomas secreting murine reaginic antibodies of anti-DNP specificity. J Immunol 124, 775-780 (1980); PRID: AB\_259249  
 Mouse Anti-NK-1.1 PE-conjugated; PRID: AB\_313394  
 Mouse Anti-paxillin; PRID: AB\_397463  
 Mouse Anti-smooth muscle actin Alexa Fluor 405-conjugated; <https://www.abcam.com/alex-fluor-405-alpha-smooth-muscle-actin-acetyl-e3--actg2-acetyl-e3-antibody-e184-ab210128.html>  
 Mouse Anti-smooth muscle actin CyTM3-conjugated; PRID: AB\_476856  
 Mouse Anti-vinculin; PRID: AB\_10603627  
 Rabbit Anti-actin ; PRID: AB\_476693  
 Rabbit Anti-collagen IV; RRID: AB\_445160  
 Rabbit Anti-Desmin; PRID: AB\_731901  
 Mouse Anti-talin; PRID: AB\_477572

Rabbit Anti-fibronectin; PRID:AB\_476976  
 Rabbit Anti-Lamc1; PRID: AB\_1079230  
 Rabbit Anti-mouse HRP-conjugated Antibody; PRID: AB\_2687969  
 Rabbit Anti-NG2; AB\_11213678  
 Rabbit Anti-Vimentin; PRID: AB\_10562134  
 Rat Anti-CD117 Brilliant Violet 421-conjugated; PRID: AB\_10898120  
 Rat Anti-CD117 APC-conjugated; PRID AB\_469434  
 Rat Anti-CD11b (Integrin alpha M) PE-conjugated; PRID: AB\_396680  
 Rat Anti-CD16/CD32 Antibody; PRID:AB\_394657  
 Rat Anti-CD18 (Integrin beta 2) PE-conjugated; clone C71/16; PRID: AB\_394762  
 Rat Anti-CD18 (Integrin beta 2) FITC-conjugated; clone C71/16; PRID AB\_394761  
 Rat Anti-CD19 PE-conjugated; PRID: AB\_657660  
 Rat Anti-CD29 (Integrin beta 1, 9EG7); RRID:AB\_395001  
 Rat Anti-CD29 Alexa Fluor 488 conjugated (Integrin beta 1, HMBeta1-1); PRID: AB\_492830  
 Rat Anti-CD29 PE conjugated (Integrin beta 1, HMBeta1-1); PRID:AB\_312884  
 Rat anti-CD31; PRID:AB\_393571  
 Rat Anti-PDGFRa; RRID:AB\_467491  
 Rat Anti-CD4 PE-conjugated; PRID: AB\_312692  
 Rat Anti-CD41 (Integrin alpha IIb) FITC-conjugated; PRID: AB\_395085  
 Rat Anti-CD49d (Integrin alpha 4) PE-conjugated; PRID: AB\_465697  
 Rat Anti-CD49e (Integrin alpha 5); PRID: AB\_396709  
 Rat Anti-CD49e (Integrin alpha 5) PE-conjugated; PRID: AB\_396710  
 Rat Anti-CD49f (Integrin alpha 6) Alexa Fluor® 488-conjugated; PRID: AB\_493635  
 Rat Anti-CD51 (Integrin alpha V) PE -conjugated; PRID: AB\_394088

Rat Anti-CD8a PE-conjugated; PRID: AB\_465530  
 Rat Anti-DARC Alexa Fluor 488-conjugated; Aude Thiriout, Carolina Perdomo, Guiying Cheng, Igor Novitzky-Basso, Sara McArdle, Jamie K. Kishimoto, Olga Barreiro, Irina Mazo, Robinson Triboulet, Klaus Ley, Antal Rot & Ulrich H. von Andrian. Differential DARC/ACKR1 expression distinguishes venular from non-venular endothelial cells in murine tissues. BMC Biol. 2017 May 19;15(1):45.  
 doi: 10.1186/s12915-017-0381-7.  
 Rat Anti-endomucin; PRID: AB\_891529  
 Rat Anti-F4/80 PE-conjugated; PRID: AB\_10372666  
 Rat Anti-Integrin β7 Chain PE-conjugated; PRID: AB\_396735  
 Rat Anti-nidogen; PRID: AB\_558792  
 Rat IgG1 kappa Isotype Control FITC-conjugated; PRID: AB\_470008  
 Rat IgG1 kappa Isotype Control PE-conjugated; PRID: AB\_470046  
 Rat IgG2a Isotype Control Alexa Fluor 488-conjugated; PRID: AB\_2556535  
 Rat IgG2a kappa Isotype Control PE-conjugated; PRID: AB\_1834380  
 Rat IgG2b kappa Isotype Control PE-conjugated; PRID: AB\_470042  
 Swine Anti-rabbit HRP-conjugated Antibody; PRID: AB\_2728719  
 Anti-MITF polyclonal; PRID: AB\_1079381

## Eukaryotic cell lines

Policy information about [cell lines and Sex and Gender in Research](#)

|                                                                      |                                                                                                                                                                                                                                                                                                                                                        |
|----------------------------------------------------------------------|--------------------------------------------------------------------------------------------------------------------------------------------------------------------------------------------------------------------------------------------------------------------------------------------------------------------------------------------------------|
| Cell line source(s)                                                  | CHO (Chinese hamster ovary) cells for SCF production; provided by Georg Häcker (University of Freiburg, Germany)<br>Immortalized MEFs (mouse embryonic fibroblasts); provided by Susanna Minguet (University of Freiburg, Germany)<br>WEHI-3 cells; provided by Rudolf Grosschedl (MPI of Immunobiology and Epigenetics, Freiburg, Germany); CVCL_3622 |
| Authentication                                                       | The used previously reported immortalized cell lines were not further authenticated.                                                                                                                                                                                                                                                                   |
| Mycoplasma contamination                                             | The used cell lines were negative for Mycoplasma contamination, proven by PCR analysis.                                                                                                                                                                                                                                                                |
| Commonly misidentified lines<br>(See <a href="#">ICLAC</a> register) | No misidentified cell lines were used in this study.                                                                                                                                                                                                                                                                                                   |

## Animals and other research organisms

Policy information about [studies involving animals](#); [ARRIVE guidelines](#) recommended for reporting animal research, and [Sex and Gender in Research](#)

|                    |                                                                                                                                                                                                                                                                                                                                                                                                                                                                                                                                                                                                                                                   |
|--------------------|---------------------------------------------------------------------------------------------------------------------------------------------------------------------------------------------------------------------------------------------------------------------------------------------------------------------------------------------------------------------------------------------------------------------------------------------------------------------------------------------------------------------------------------------------------------------------------------------------------------------------------------------------|
| Laboratory animals | Mice between 7 to 12 weeks on C57BL/6J were used for this study. The following mouse strains were used in this study, detailed references are also given in the methods section of this manuscript:<br>Itgb1tm1Ref, MGI: 1926498;<br>Itgb2tm2Bay, MGI: 1861705;<br>Itgb3tm1.1Wlbc, MGI: 5688572;<br>Commd10Tg(Vav1-iCre)A2Kio, MGI: 2449949<br>Gt(ROSA)26Sortm1(EYFP)Cos, MGI: 2449041 (also referred to as Rosa26-LSL:YFP);<br>Gt(ROSA)26Sor tm14(CAG-tdTomato)Hze, MGI: 3809524 (also referred to as Rosa26-LSL:Tom);<br>Tg(Myh11-cre,-EGFP)2Mik, MGI: 2653286;<br>Tyrc-2J (B6.Albino); MGI: 1855985<br>Tg(UBC-Brainbow1.0L)35Mal, MGI: 5645781 |
|--------------------|---------------------------------------------------------------------------------------------------------------------------------------------------------------------------------------------------------------------------------------------------------------------------------------------------------------------------------------------------------------------------------------------------------------------------------------------------------------------------------------------------------------------------------------------------------------------------------------------------------------------------------------------------|

Kitltm1.1Sjm, MGI: 5300819  
 Tg(Kitl-ERT2Cre,-TdT), provided by Claus Nerlov (University of Oxford, United Kingdom), Buono et al 2016  
 Tg(CAG-EGFP)#Rows, MGI: 4831036  
 Tg(Cma1-cre)ARoer (brief: Mcpt5-Cre), MGI: 3785000  
 Tln1tm4.1Crit, MGI:3770513  
 Rag2tm1Fwa, MGI: 1858556  
 Mcpt5-Cre Tln1-fl/fl mice and crosses with fluorescent reporter lines (Rosa26LSL:YFP, Tg(Ubow)) were on a Tyrc-2J/c-2J (C57BL/6J-Albino) background, as we initially planned intravital microscopy studies of ear skin in these mice.

|                         |                                                                                                                                                                                                                                                                                                                                                                                                                                                                                                       |
|-------------------------|-------------------------------------------------------------------------------------------------------------------------------------------------------------------------------------------------------------------------------------------------------------------------------------------------------------------------------------------------------------------------------------------------------------------------------------------------------------------------------------------------------|
| Wild animals            | This study did not involve wild animals.                                                                                                                                                                                                                                                                                                                                                                                                                                                              |
| Reporting on sex        | Both male and female mice were used for experiments. In comparative experiments, control and knockout mice were sex- and age-matched littermates.                                                                                                                                                                                                                                                                                                                                                     |
| Field-collected samples | No field-collected samples were used in this study.                                                                                                                                                                                                                                                                                                                                                                                                                                                   |
| Ethics oversight        | Mouse breeding and husbandry were performed at the Max Planck Institute of Immunobiology and Epigenetics, Freiburg, in accordance with the guidelines provided by the Federation of European Laboratory Animal Science Association and as approved by German authorities (Regional Council of Freiburg). Mice were only used for organ removal after euthanasia by carbon dioxide exposure and thus not subject to experimental procedures and ethical approval according to §4 (3) Tierschutzgesetz. |

Note that full information on the approval of the study protocol must also be provided in the manuscript.

## Flow Cytometry

### Plots

Confirm that:

- The axis labels state the marker and fluorochrome used (e.g. CD4-FITC).
- The axis scales are clearly visible. Include numbers along axes only for bottom left plot of group (a 'group' is an analysis of identical markers).
- All plots are contour plots with outliers or pseudocolor plots.
- A numerical value for number of cells or percentage (with statistics) is provided.

### Methodology

|                           |                                                                                                                                                        |
|---------------------------|--------------------------------------------------------------------------------------------------------------------------------------------------------|
| Sample preparation        | Details on sample preparation for flow cytometry are provided in the Methods section (Flow Cytometry)                                                  |
| Instrument                | BD LSR Fortessa & BD LSRII                                                                                                                             |
| Software                  | Data collection: BD FACSDiva software<br>Data analysis: FlowJo software v10 (Tree Star, Ashland, OR, USA)                                              |
| Cell population abundance | Sorted mast cells from skin were analyzed by single cell RNA sequencing and confirmed the expression of the mast cell marker Cpa3 of all sorted cells. |
| Gating strategy           | Gating strategies have been included in Extended Data Figure 1 and 2.                                                                                  |

- Tick this box to confirm that a figure exemplifying the gating strategy is provided in the Supplementary Information.
