# Supplementary material for: Slow integrin-dependent migration organizes networks of tissue-resident mast cells
Source: PubMed Central journal article supplement (PMC10232366; doi:10.1038/s41590-023-01493-2), 2023-04-20

Bone marrow-derived mast cells (BMMC)

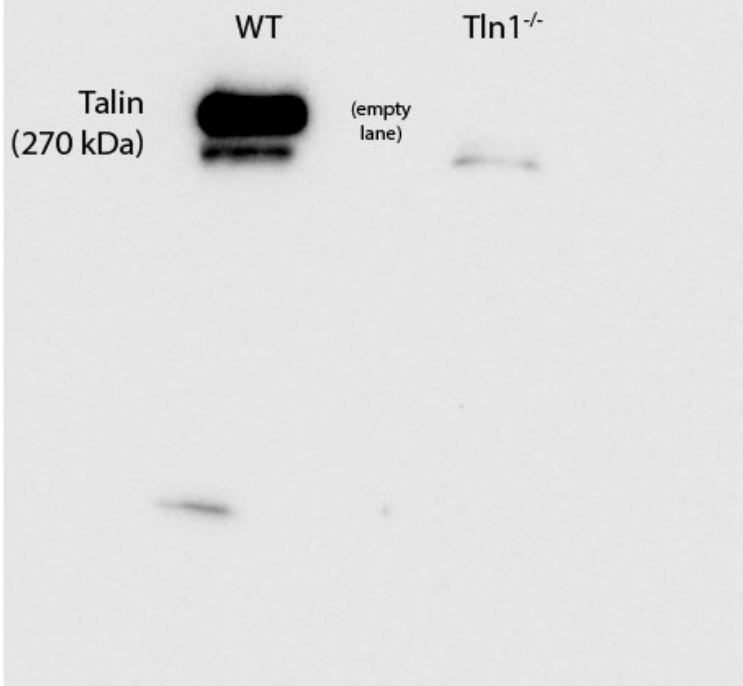

Bone marrow-derived mast cells (BMMC)

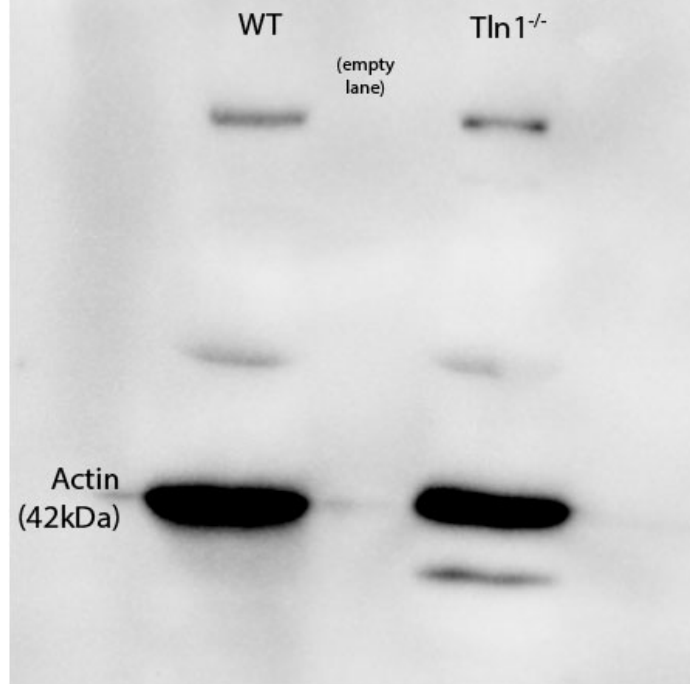

Peritoneal mast cells (PMC)

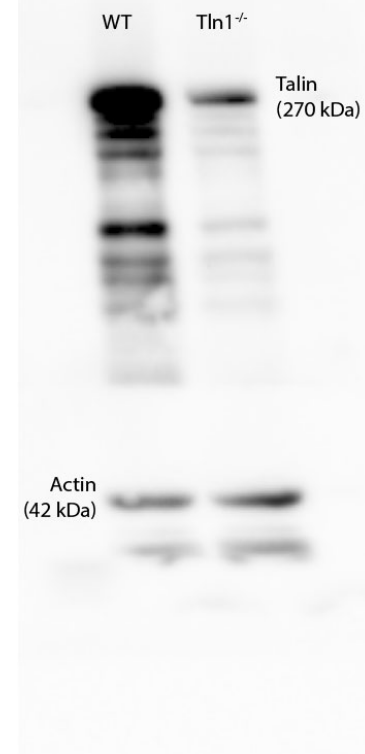

Supplement: 41590_2023_1493_MOESM16_ESM.pdf [file 41590_2023_1493_MOESM16_ESM.pdf]
